# Supplementary material for: Ultra-thin ZnO film as an electron transport layer for realizing the high efficiency of organic solar cells
Source: Royal Society of Chemistry journal article supplement (doi:10.1039/c6ra27543e), 2017-01-01
Supplement: c6ra27543e1.pdf [file c6ra27543e1.pdf]

Ultra-thin ZnO film as electron transport layer for realizing high efficiency of organic solar cells

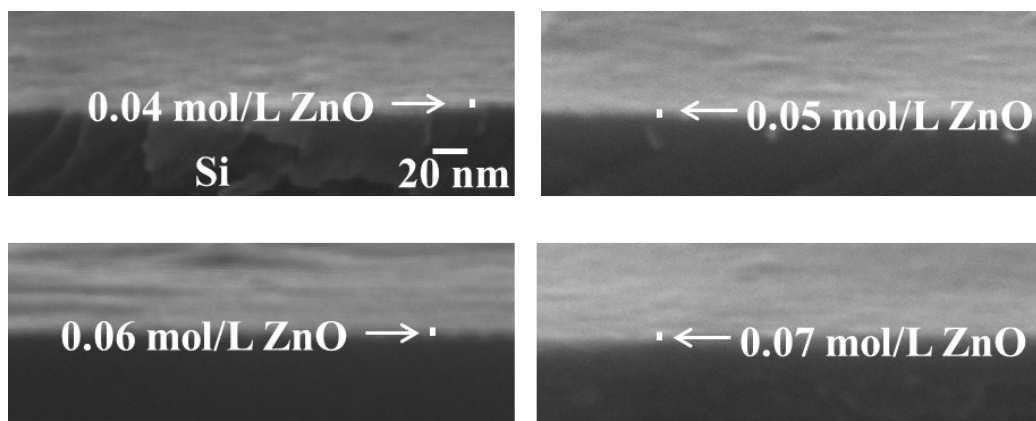

Fig. S1 The cross-sectional scanning electron microscopy images of the ultra-thin ZnO films on bare silicon.

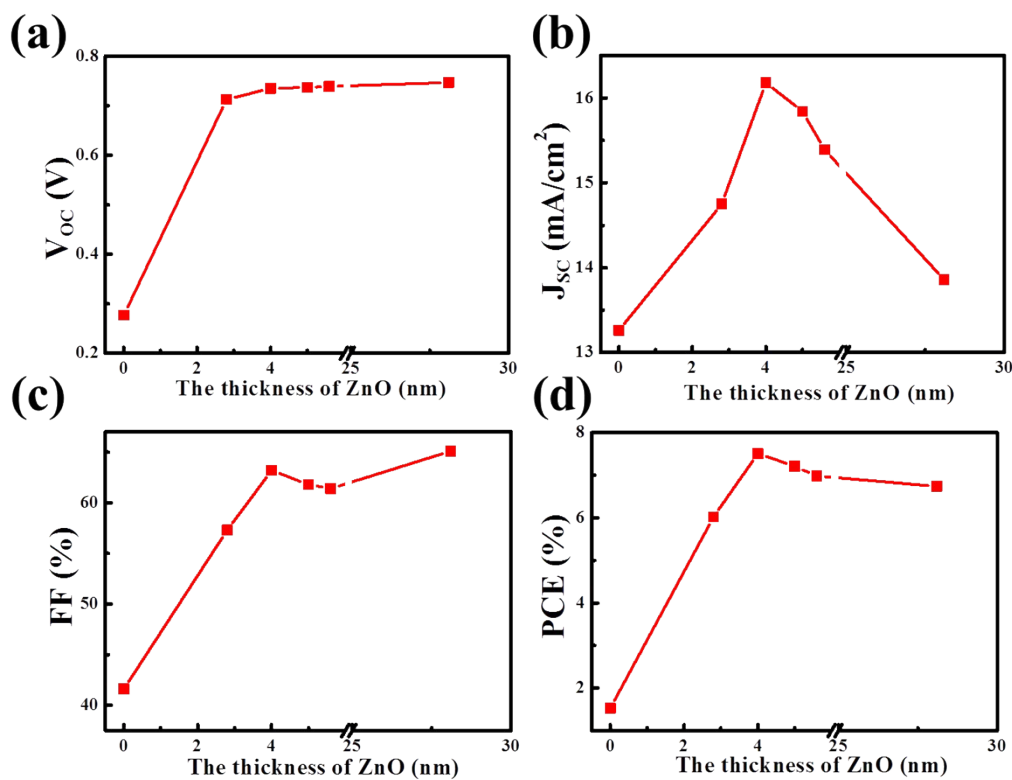

Fig. S2  $V_{OC}$ ,  $J_{SC}$ , FF and PCE vs. ZnO film thickness (from 0 nm to 28.1 nm).

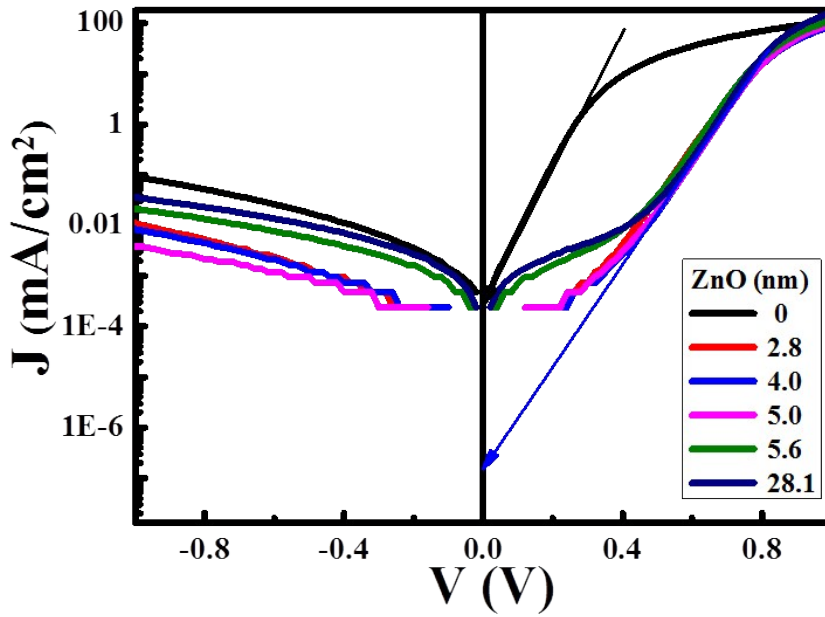

Fig. S3 J-V curves of the devices with different thicknesses of ZnO film in dark.

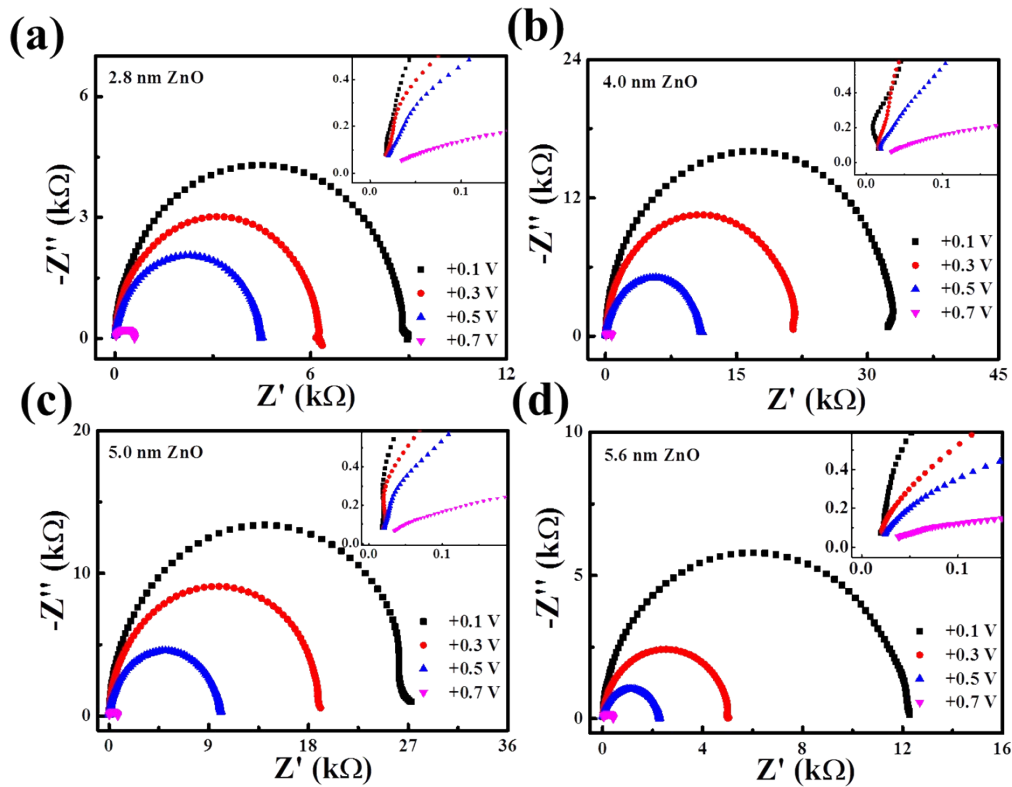

Fig. S4 Impedance spectra of devices with different thicknesses of ZnO film. Nyquist plots of devices under different bias in dark: (a) with 2.8 nm ZnO, (b) with 4.0 nm ZnO, (c) with 5.0 nm ZnO and (d) with 5.6 nm ZnO. Insets show the high frequency part of the plots.

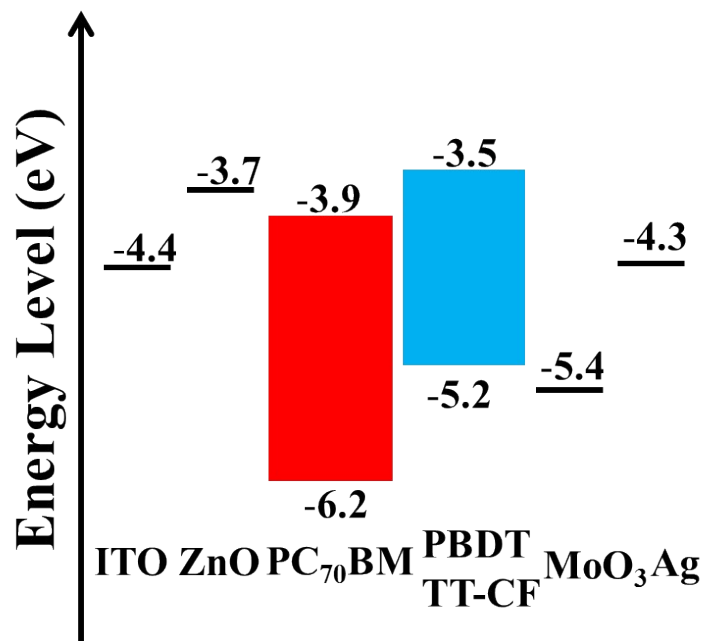

Fig. S5 The schematic energy diagram of the materials.

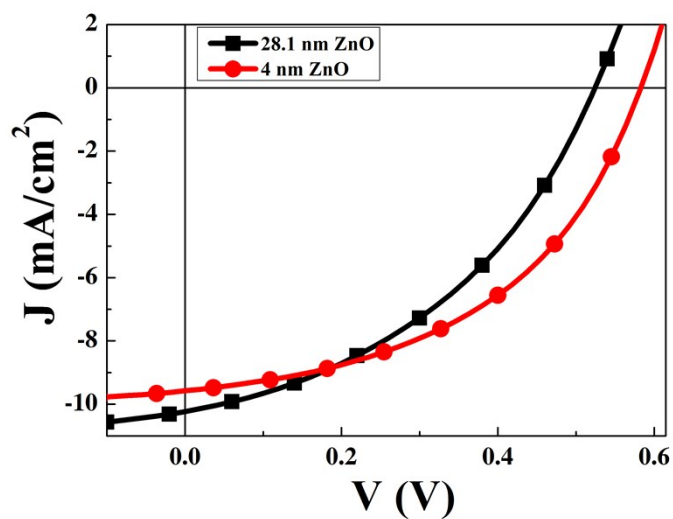

Fig. S6 The J-V curves of the devices with 28.1nm and 4 nm ZnO film.

Table S1 The extracted data of devices with different ZnO film thicknesses for fitting the experimental data of impedance spectroscopy.

| ZnO<br>(nm) | R <sub>s</sub><br>(Ω) | R <sub>1</sub><br>(Ω) | R <sub>2</sub><br>(Ω) |
|-------------|-----------------------|-----------------------|-----------------------|
| 0           | 27.57                 | 5235                  | 10.67                 |
| 2.8         | 22.45                 | 17810                 | 6155                  |
| 4.0         | 14.55                 | 17810                 | 21680                 |
| 5.0         | 20.22                 | 17810                 | 17770                 |
| 5.6         | 21.01                 | 17810                 | 12669                 |

Table S2 The parameters of bi-exponential model for fitting the photoluminescence decay curves.

| The thickness of<br>ZnO film (nm) | B <sub>1</sub> | T <sub>1</sub><br>(ns) | B <sub>2</sub> | T <sub>2</sub><br>(ns) | <τ><br>(ns) |
|-----------------------------------|----------------|------------------------|----------------|------------------------|-------------|
| 0                                 | 0.0932         | 0.666                  | 0.01           | 4.364                  | 2.193±0.033 |
| 2.8                               | 0.1174         | 0.479                  | 0.0105         | 3.572                  | 1.717±0.066 |
| 4.0                               | 0.161          | 0.355                  | 0.0078         | 3.128                  | 1.185±0.102 |
| 5.0                               | 0.1629         | 0.364                  | 0.0063         | 3.753                  | 1.330±0.082 |
| 5.6                               | 0.1361         | 0.437                  | 0.0075         | 3.499                  | 1.374±0.047 |
| 28.1                              | 0.1422         | 0.411                  | 0.0078         | 4.013                  | 1.667±0.054 |

The fitting was performance with the bi-exponential model:

$$A + B_1 * \exp\left(-\frac{t}{T_1}\right) + B_2 * \exp\left(-\frac{t}{T_2}\right) \quad (S1)$$

The lifetime was caculated by:

$$\langle \tau \rangle = \frac{B_1 \times T_1^2 + B_2 \times T_2^2}{B_1 \times T_1 + B_2 \times T_2} \quad (S2)$$
